# Supplementary material for: Dissociation Between Incubation of Cocaine Craving and Anxiety-Related Behaviors After Continuous and Intermittent Access Self-Administration
Source: Frontiers journal article supplement (doi:10.3389/fnins.2021.824741), 2022-02-07
Supplement: Data_Sheet_1.pdf [file Data_Sheet_1.pdf]

## Supplementary Online Material

### Dissociation of incubation of cocaine craving and anxiety-related behaviors after continuous and intermittent access self-administration

#### Table of content

Supplementary figure 1

Supplementary Table 1

#### Supplementary Figure 1.

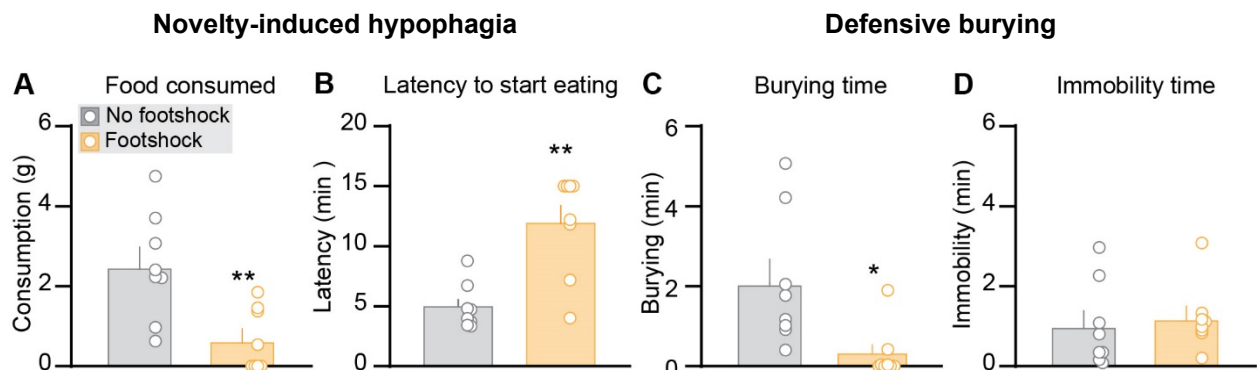

*Intermittent footshock-induced anxiety-related behaviors in the novelty-induced hypophagia and defensive burying tests.*

Novelty-induced hypophagia. **(A) Food consumed:** Mean  $\pm$  SEM grams of food consumed (no footshock, n=8; intermittent footshock, n=8). **(B) Latency to start eating:** Mean  $\pm$  SEM minutes to start (no footshock, n=8; intermittent footshock, n=8).

Defensive burying. **(C) Burying time:** Mean  $\pm$  SEM time of probe burying per min (no footshock, n=8; intermittent footshock, n=8). **(D) Immobility time.** Mean  $\pm$  SEM immobility time in minute (no footshock, n=8; intermittent footshock, n=8). Different from intermittent footshock \*  $p < 0.05$  and \*\*  $p < 0.01$ .

| <b>Table S1. Statistical analysis (SPSS GLM repeated-measures module)</b> |                                                                                                                                                                                          |                                                                                                                                       |                                                                     |
|---------------------------------------------------------------------------|------------------------------------------------------------------------------------------------------------------------------------------------------------------------------------------|---------------------------------------------------------------------------------------------------------------------------------------|---------------------------------------------------------------------|
|                                                                           | <b>Factor Name</b>                                                                                                                                                                       | <b>F-values</b>                                                                                                                       | <b>p-values</b>                                                     |
| Fig 1B<br>Cocaine intake (acquisition)                                    | Schedule (between)<br>Session (within)<br>Group X Session                                                                                                                                | $F_{1,16}=0.12$<br>$F_{6,96}=4.86$<br>$F_{6,96}=0.35$                                                                                 | 0.73<br>0.0002*<br>0.91                                             |
| Fig 1B<br>Cocaine intake (training)                                       | Group (between)<br>Session (within)<br>Group X Session                                                                                                                                   | $F_{1,16}=52.80$<br>$F_{13,208}=8.69$<br>$F_{13,208}=1.12$                                                                            | <0.0001*<br><0.0001*<br>0.35                                        |
| Fig 1C<br>Frequency of intake (acquisition)                               | Group (between)<br>Session (within)<br>Group X Session                                                                                                                                   | $F_{1,16}=0.11$<br>$F_{6,96}=4.86$<br>$F_{6,96}=0.38$                                                                                 | 0.74<br>0.0002*<br>0.89                                             |
| Fig 1C<br>Frequency of intake (training)                                  | Group (between)<br>Session (within)<br>Group X Session                                                                                                                                   | $F_{1,16}=75.54$<br>$F_{13,208}=4.98$<br>$F_{13,208}=1.85$                                                                            | 0.0001*<br>0.0001*<br>0.04*                                         |
| Fig 1D<br>Relapse test                                                    | Group (between)<br>Abstinence day (within)<br>Lever (within)<br>Group X Abstinence day<br>Group X Lever<br>Abstinence day X Lever<br>Group X Abstinence day X Lever                      | $F_{1,16}=16.39$<br>$F_{1,16}=33.15$<br>$F_{1,16}=38.84$<br>$F_{1,16}=0.03$<br>$F_{1,16}=1.26$<br>$F_{1,16}=37.60$<br>$F_{1,16}=0.98$ | 0.0009*<br><0.0001*<br><0.0001*<br>0.86<br>0.28<br><0.0001*<br>0.34 |
| Fig 1E<br>Progressive ratio (final ratio)                                 | Group (between)                                                                                                                                                                          | $t_{15}=2.64$                                                                                                                         | 0.02*                                                               |
| Fig 1E<br>Progressive ratio (infusions)                                   | Group (between)                                                                                                                                                                          | $t_{15}=2.47$                                                                                                                         | 0.03*                                                               |
| Fig 2A<br>Food consumed                                                   | Group (between)<br>Test order (between)<br>Abstinence day (within)<br>Group X Test order<br>Group X Abstinence day<br>Order X Abstinence day<br>Group X Test order X Abstinence day      | $F_{2,23}=1.25$<br>$F_{1,23}=0.71$<br>$F_{1,23}=43.68$<br>$F_{2,23}=0.57$<br>$F_{2,23}=0.35$<br>$F_{1,23}=0.48$<br>$F_{2,23}=0.44$    | 0.31<br>0.41<br><0.0001*<br>0.58<br>0.71<br>0.49<br>0.65            |
| Fig 2 B<br>Latency to eat                                                 | Group (between)<br>Test order (between)<br>Abstinence day (within)<br>Group X Test order<br>Group X Abstinence day<br>Test order X Abstinence day<br>Group X Test order X Abstinence day | $F_{2,23}=0.74$<br>$F_{1,23}=0.65$<br>$F_{1,23}=6.75$<br>$F_{2,23}=2.53$<br>$F_{2,23}=0.27$<br>$F_{1,23}=0.55$<br>$F_{2,23}=0.59$     | 0.49<br>0.43<br>0.02*<br>0.10<br>0.76<br>0.47<br>0.56               |
| Fig 3A<br>Correlation food consumed and cocaine seeking day 1             | Continuous access<br>Intermittent access                                                                                                                                                 | $R^2=0.02$<br>$R^2=0.003$                                                                                                             | 0.66<br>0.91                                                        |
| Fig 3B<br>Correlation food consumed and cocaine seeking day 21            | Continuous access<br>Intermittent access                                                                                                                                                 | $R^2=0.04$<br>$R^2=0.05$                                                                                                              | 0.58<br>0.34                                                        |
| Fig 3C<br>Correlation food consumed and incubation scores                 | Continuous access<br>Intermittent access                                                                                                                                                 | $R^2=0.17$<br>$R^2=0.16$                                                                                                              | 0.21<br>0.37                                                        |
| Fig 4A<br>Correlation latency to eat and cocaine seeking day 1            | Continuous access<br>Intermittent access                                                                                                                                                 | $R^2=0.002$<br>$R^2=0.16$                                                                                                             | 0.88<br>0.36                                                        |
| Fig 4B<br>Correlation latency to eat and cocaine seeking day 21           | Continuous access<br>Intermittent access                                                                                                                                                 | $R^2=0.009$<br>$R^2=0.01$                                                                                                             | 0.78<br>0.80                                                        |
| Fig 4C Correlation latency to eat and incubation scores                   | Continuous access<br>Intermittent access                                                                                                                                                 | $R^2=0.04$<br>$R^2=0.08$                                                                                                              | 0.58<br>0.54                                                        |
| Supplementary Figure 1A<br>Food consumed                                  | Footshock condition (between)                                                                                                                                                            | $t_{14}=3.33$                                                                                                                         | 0.005*                                                              |

|                                           |                               |               |         |
|-------------------------------------------|-------------------------------|---------------|---------|
| Supplementary Figure 1B<br>Latency to eat | Footshock condition (between) | $t_{14}=4.28$ | 0.0008* |
| Supplementary Figure 1C<br>Burying time   | Footshock condition (between) | $t_{14}=2.79$ | 0.01*   |
| Supplementary Figure 1D<br>Immobility     | Footshock condition (between) | $t_{14}=0.41$ | 0.69    |
